# Supplementary material for: T Cell-Induced Colitis Is Exacerbated by Prolonged Stress: A Comparison in Male and Female Mice
Source: MDPI journal article supplement (doi:10.3390/biomedicines12010214), 2024-01-18
Supplement: s1 [file s1]

Supplemental Table S1. Primer sequences

| <b>Genes</b>                   | <b>Sequence (5'-3')</b>                                    | <b>Annealing Temperature (°C)</b> |
|--------------------------------|------------------------------------------------------------|-----------------------------------|
| <b>TNF-<math>\alpha</math></b> | F: AGGCACTCCCCCAAAGATG<br>R: GTAGACAGAAGAGCGTGGTGG         | 60                                |
| <b>INF-<math>\gamma</math></b> | F: GGTCAACAACCCACAGGTCC<br>R: ACTCCTTTTCCGCTTCCTGAG        | 60                                |
| <b>IL-1<math>\beta</math></b>  | F: GCACTACAGGCTCCGAGATGAAC<br>R: TTGTCGTTGCTTGGTTCTCCTTGT  | 60                                |
| <b>iNOS</b>                    | F: AGTGAAAAGTCGAGCCGCA<br>R: ACAATCCACAACCTCGCTCCA         | 60                                |
| <b>IL-2</b>                    | F: CCTGAGCAGGATGGAGAATTACA<br>R: TCCAGAACATGCCGCAGAG       | 60                                |
| <b>IL-6</b>                    | F: GACTGATGCTGGTGACAAC<br>R: ATCCTCTGTGAAGTCTCCTC          | 60                                |
| <b>IL-7</b>                    | F: ATTATGGGTGGTAGCCG<br>R: GTTCCTGTCAATTTGTCCAATTCA        | 60                                |
| <b>IL-17A</b>                  | F: ACTACCTCAACCGTTCCA<br>R: GAGGGATATCTATCAGGGTC           | 60                                |
| <b>IL-22</b>                   | F: CCTGACCAAACCTCAGCAATC<br>R: GCCTTCTGACATTCTTCTGG        | 60                                |
| <b>IL-23a</b>                  | F: CAAGGACAACAGCCAGTTCTGCTT<br>R: AGGCTCCCCTTTGAAGATGTCAGA | 60                                |
| <b>EEF2</b>                    | F: TGTCAGTCATCGCCCATGTG<br>R: GGAGATGGCGGTGGATTTGA         | 60                                |
